# Supplementary material for: Inflammatory biomarkers and subclinical carotid atherosclerosis in HIV-infected and HIV-uninfected men in the Multicenter AIDS Cohort Study
Source: PubMed Central journal article supplement (PMC6448851; doi:10.1371/journal.pone.0214735), 2019-04-04
Supplement: pone.0214735.s005.pdf [file pone.0214735.s005.pdf]

**S4 Table. Correlation among inflammatory biomarkers, stratified by HIV serostatus**

| <b>HIV-infected men (N=452)</b>   |               |              |             |             |               |                   |                |            |                                   |                                   |
|-----------------------------------|---------------|--------------|-------------|-------------|---------------|-------------------|----------------|------------|-----------------------------------|-----------------------------------|
|                                   | <b>sCD163</b> | <b>sCD14</b> | <b>CCL2</b> | <b>IL-6</b> | <b>ICAM-1</b> | <b>Fibrinogen</b> | <b>D-dimer</b> | <b>CRP</b> | <b>sTNF-<math>\alpha</math>R1</b> | <b>sTNF-<math>\alpha</math>R2</b> |
| <b>sCD163</b>                     | 1.00          |              |             |             |               |                   |                |            |                                   |                                   |
| <b>sCD14</b>                      | 0.12          | 1.00         |             |             |               |                   |                |            |                                   |                                   |
| <b>CCL2</b>                       | 0.15          | 0.19         | 1.00        |             |               |                   |                |            |                                   |                                   |
| <b>IL-6</b>                       | 0.10          | 0.14         | 0.05        | 1.00        |               |                   |                |            |                                   |                                   |
| <b>ICAM-1</b>                     | 0.46          | 0.21         | 0.16        | 0.15        | 1.00          |                   |                |            |                                   |                                   |
| <b>Fibrinogen</b>                 | 0.06          | 0.12         | 0.10        | 0.12        | 0.06          | 1.00              |                |            |                                   |                                   |
| <b>D-dimer</b>                    | 0.13          | 0.20         | 0.05        | 0.21        | 0.12          | 0.11              | 1.00           |            |                                   |                                   |
| <b>CRP</b>                        | 0.04          | 0.27         | 0.16        | 0.28        | 0.15          | 0.21              | 0.45           | 1.00       |                                   |                                   |
| <b>sTNF-<math>\alpha</math>R1</b> | 0.14          | 0.21         | 0.25        | 0.10        | 0.12          | 0.06              | 0.16           | 0.09       | 1.00                              |                                   |
| <b>sTNF-<math>\alpha</math>R2</b> | 0.42          | 0.38         | 0.33        | 0.24        | 0.43          | 0.13              | 0.33           | 0.35       | 0.71                              | 1.00                              |
| <b>HIV-uninfected men (N=276)</b> |               |              |             |             |               |                   |                |            |                                   |                                   |
|                                   | <b>sCD163</b> | <b>sCD14</b> | <b>CCL2</b> | <b>IL-6</b> | <b>ICAM-1</b> | <b>Fibrinogen</b> | <b>D-dimer</b> | <b>CRP</b> | <b>sTNF-<math>\alpha</math>R1</b> | <b>sTNF-<math>\alpha</math>R2</b> |
| <b>sCD163</b>                     | 1.00          |              |             |             |               |                   |                |            |                                   |                                   |
| <b>sCD14</b>                      | 0.08          | 1.00         |             |             |               |                   |                |            |                                   |                                   |
| <b>CCL2</b>                       | 0.06          | 0.07         | 1.00        |             |               |                   |                |            |                                   |                                   |
| <b>IL-6</b>                       | 0.15          | 0.23         | 0.30        | 1.00        |               |                   |                |            |                                   |                                   |
| <b>ICAM-1</b>                     | 0.34          | 0.06         | 0.05        | 0.11        | 1.00          |                   |                |            |                                   |                                   |
| <b>Fibrinogen</b>                 | 0.18          | 0.21         | 0.15        | 0.26        | 0.16          | 1.00              |                |            |                                   |                                   |
| <b>D-dimer</b>                    | 0.06          | 0.16         | 0.23        | 0.44        | 0.06          | 0.26              | 1.00           |            |                                   |                                   |
| <b>CRP</b>                        | 0.18          | 0.28         | 0.22        | 0.50        | 0.19          | 0.52              | 0.47           | 1.00       |                                   |                                   |
| <b>sTNF-<math>\alpha</math>R1</b> | 0.21          | 0.11         | 0.29        | 0.28        | 0.17          | 0.17              | 0.27           | 0.20       | 1.00                              |                                   |
| <b>sTNF-<math>\alpha</math>R2</b> | 0.35          | 0.21         | 0.22        | 0.21        | 0.34          | 0.17              | 0.09           | 0.25       | 0.61                              | 1.00                              |

Pearson correlation coefficient included in tables with 1.0 indicating a perfect positive correlation. Abbreviations: sCD163, cluster of differentiation 163; sCD14, cluster of differentiation 14; CCL2, chemokine (C-C motif) ligand 2; IL-6, interleukin-6; ICAM-1, intercellular cell adhesion molecule-1; CRP, C reactive protein; sTNF- $\alpha$ R1, tumor necrosis factor-alpha receptor 1; sTNF- $\alpha$ R2, tumor necrosis factor-alpha receptor 2.
