# Supplementary material for: Inflammatory biomarkers and subclinical carotid atherosclerosis in HIV-infected and HIV-uninfected men in the Multicenter AIDS Cohort Study
Source: PubMed Central journal article supplement (PMC6448851; doi:10.1371/journal.pone.0214735), 2019-04-04
Supplement: pone.0214735.s006.pdf [file pone.0214735.s006.pdf]

**S5 Table. Associations between inflammatory biomarkers and the presence of focal carotid plaque (N=728)**

| <b>Biomarker</b> | <b>Model A*<br/>OR (95% CI)</b> |              | <b>Model B†<br/>aOR (95% CI)</b> |              | <b>Model C‡<br/>aOR (95% CI)</b> |              |
|------------------|---------------------------------|--------------|----------------------------------|--------------|----------------------------------|--------------|
| <b>sCD163</b>    |                                 |              |                                  |              |                                  |              |
| Quintile 1       | Ref <sup>  </sup>               | Ref          | Ref <sup>  </sup>                | Ref          | Ref <sup>  </sup>                | Ref          |
| Quintile 2       | 1.15                            | [0.67, 1.95] | 1.08                             | [0.61, 1.90] | 1.18                             | [0.65, 2.15] |
| Quintile 3       | 1.46                            | [0.87, 2.47] | 1.31                             | [0.75, 2.31] | 1.49                             | [0.81, 2.71] |
| Quintile 4       | 1.51                            | [0.90, 2.55] | 1.39                             | [0.78, 2.46] | 1.45                             | [0.79, 2.69] |
| Quintile 5       | 2.39 <sup>***</sup>             | [1.43, 3.99] | 1.97 <sup>*</sup>                | [1.12, 3.47] | 1.93 <sup>*</sup>                | [1.02, 3.68] |
| <b>sCD14</b>     |                                 |              |                                  |              |                                  |              |
| Quintile 1       | Ref <sup>  </sup>               | Ref          | Ref <sup>  </sup>                | Ref          | Ref                              | Ref          |
| Quintile 2       | 0.73                            | [0.43, 1.25] | 0.81                             | [0.46, 1.43] | 0.84                             | [0.46, 1.54] |
| Quintile 3       | 1.18                            | [0.71, 1.96] | 1.12                             | [0.64, 1.94] | 1.03                             | [0.58, 1.85] |
| Quintile 4       | 1.18                            | [0.71, 1.96] | 1.19                             | [0.67, 2.13] | 1.12                             | [0.61, 2.08] |
| Quintile 5       | 2.00 <sup>**</sup>              | [1.22, 3.27] | 2.01 <sup>*</sup>                | [1.11, 3.62] | 1.47                             | [0.77, 2.81] |
| <b>ICAM-1</b>    |                                 |              |                                  |              |                                  |              |
| Quintile 1       | Ref <sup>  </sup>               | Ref          | Ref                              | Ref          | Ref                              | Ref          |
| Quintile 2       | 1.26                            | [0.76, 2.08] | 1.02                             | [0.59, 1.78] | 0.96                             | [0.53, 1.71] |
| Quintile 3       | 0.98                            | [0.58, 1.66] | 0.78                             | [0.44, 1.40] | 0.78                             | [0.42, 1.45] |
| Quintile 4       | 1.22                            | [0.73, 2.04] | 0.78                             | [0.44, 1.37] | 0.66                             | [0.36, 1.20] |
| Quintile 5       | 2.21 <sup>**</sup>              | [1.35, 3.62] | 1.90 <sup>*</sup>                | [1.10, 3.26] | 1.43                             | [0.78, 2.59] |
| <b>CCL2</b>      |                                 |              |                                  |              |                                  |              |
| Quintile 1       | Ref <sup>  </sup>               | Ref          | Ref <sup>  </sup>                | Ref          | Ref <sup>  </sup>                | Ref          |
| Quintile 2       | 1.47                            | [0.85, 2.54] | 1.24                             | [0.69, 2.21] | 1.44                             | [0.78, 2.66] |
| Quintile 3       | 1.57                            | [0.91, 2.71] | 1.37                             | [0.77, 2.46] | 1.44                             | [0.77, 2.66] |
| Quintile 4       | 2.31 <sup>**</sup>              | [1.35, 3.95] | 1.76                             | [0.98, 3.14] | 1.66                             | [0.89, 3.07] |
| Quintile 5       | 3.49 <sup>***</sup>             | [2.06, 5.92] | 3.07 <sup>***</sup>              | [1.73, 5.45] | 2.94 <sup>***</sup>              | [1.60, 5.40] |

| <b>Biomarker</b>  | <b>Model A*<br/>OR (95% CI)</b> |              | <b>Model B†<br/>aOR (95% CI)</b> |              | <b>Model C‡<br/>aOR (95% CI)</b> |              |
|-------------------|---------------------------------|--------------|----------------------------------|--------------|----------------------------------|--------------|
| <b>CRP</b>        |                                 |              |                                  |              |                                  |              |
| Quintile 1        | Ref <sup>  </sup>               | Ref          | Ref <sup>  </sup>                | Ref          | Ref <sup>  </sup>                | Ref          |
| Quintile 2        | 1.42                            | [0.84, 2.40] | 1.42                             | [0.81, 2.48] | 1.42                             | [0.79, 2.57] |
| Quintile 3        | 1.79*                           | [1.07, 3.01] | 1.72                             | [0.99, 2.99] | 1.66                             | [0.92, 2.98] |
| Quintile 4        | 1.90*                           | [1.14, 3.17] | 1.80*                            | [1.04, 3.11] | 1.66                             | [0.92, 2.99] |
| Quintile 5        | 2.12**                          | [1.26, 3.55] | 2.21**                           | [1.26, 3.86] | 2.21*                            | [1.20, 4.06] |
| <b>IL-6</b>       |                                 |              |                                  |              |                                  |              |
| Quintile 1        | Ref <sup>  </sup>               | Ref          | Ref <sup>  </sup>                | Ref          | Ref <sup>  </sup>                | Ref          |
| Quintile 2        | 1.39                            | [0.81, 2.38] | 1.06                             | [0.60, 1.88] | 1.05                             | [0.58, 1.92] |
| Quintile 3        | 2.03**                          | [1.21, 3.42] | 1.76*                            | [1.01, 3.07] | 1.64                             | [0.90, 3.00] |
| Quintile 4        | 2.20**                          | [1.30, 3.73] | 1.84*                            | [1.04, 3.27] | 1.64                             | [0.88, 3.04] |
| Quintile 5        | 2.57***                         | [1.54, 4.31] | 2.01*                            | [1.14, 3.54] | 1.82                             | [0.99, 3.36] |
| <b>sTNF-αR1</b>   |                                 |              |                                  |              |                                  |              |
| Quintile 1        | Ref <sup>  </sup>               | Ref          | Ref                              | Ref          | Ref                              | Ref          |
| Quintile 2        | 0.65                            | [0.39, 1.09] | 0.56*                            | [0.32, 0.98] | 0.60                             | [0.33, 1.09] |
| Quintile 3        | 0.91                            | [0.55, 1.50] | 0.80                             | [0.47, 1.36] | 0.78                             | [0.44, 1.39] |
| Quintile 4        | 1.30                            | [0.80, 2.12] | 1.07                             | [0.63, 1.83] | 1.08                             | [0.61, 1.91] |
| Quintile 5        | 1.47                            | [0.90, 2.39] | 1.03                             | [0.60, 1.77] | 0.76                             | [0.42, 1.38] |
| <b>sTNF-αR2</b>   |                                 |              |                                  |              |                                  |              |
| Quintile 1        | Ref <sup>  </sup>               | Ref          | Ref                              | Ref          | Ref                              | Ref          |
| Quintile 2        | 1.37                            | [0.82, 2.28] | 1.38                             | [0.79, 2.39] | 1.44                             | [0.81, 2.56] |
| Quintile 3        | 1.32                            | [0.79, 2.19] | 1.11                             | [0.65, 1.91] | 1.12                             | [0.63, 1.99] |
| Quintile 4        | 1.17                            | [0.70, 1.97] | 0.92                             | [0.52, 1.61] | 0.86                             | [0.48, 1.57] |
| Quintile 5        | 2.06**                          | [1.24, 3.40] | 1.57                             | [0.90, 2.73] | 1.21                             | [0.66, 2.24] |
| <b>Fibrinogen</b> |                                 |              |                                  |              |                                  |              |
| Quintile 1        | Ref <sup>  </sup>               | Ref          | Ref                              | Ref          | Ref                              | Ref          |

| <b>Biomarker</b> | <b>Model A*</b><br><b>OR (95% CI)</b> |              | <b>Model B†</b><br><b>aOR (95% CI)</b> |              | <b>Model C‡</b><br><b>aOR (95% CI)</b> |              |
|------------------|---------------------------------------|--------------|----------------------------------------|--------------|----------------------------------------|--------------|
| Quintile 2       | 1.12                                  | [0.67, 1.88] | 1.26                                   | [0.72, 2.20] | 1.40                                   | [0.77, 2.53] |
| Quintile 3       | 1.23                                  | [0.74, 2.05] | 1.33                                   | [0.77, 2.30] | 1.34                                   | [0.74, 2.41] |
| Quintile 4       | 1.37                                  | [0.82, 2.26] | 1.26                                   | [0.73, 2.18] | 1.31                                   | [0.73, 2.36] |
| Quintile 5       | 1.74*                                 | [1.06, 2.87] | 1.65                                   | [0.96, 2.86] | 1.55                                   | [0.86, 2.80] |
| <b>D-dimer</b>   |                                       |              |                                        |              |                                        |              |
| Quintile 1       | Ref                                   | Ref          | Ref                                    | Ref          | Ref                                    | Ref          |
| Quintile 2       | 1.57                                  | [0.96, 2.56] | 1.45                                   | [0.86, 2.45] | 1.47                                   | [0.84, 2.57] |
| Quintile 3       | 1.18                                  | [0.73, 1.92] | 0.97                                   | [0.58, 1.62] | 0.87                                   | [0.50, 1.51] |
| Quintile 4       | 1.28                                  | [0.79, 2.07] | 1.08                                   | [0.63, 1.84] | 0.98                                   | [0.55, 1.74] |
| Quintile 5       | 1.44                                  | [0.90, 2.32] | 1.02                                   | [0.61, 1.73] | 0.91                                   | [0.52, 1.59] |

Abbreviations: sCD163, cluster of differentiation 163; sCD14, cluster of differentiation 14; CCL2, chemokine (C-C motif) ligand 2; ICAM-1, intercellular cell adhesion molecule-1; CRP, C reactive protein; IL-6, interleukin-6; sTNF- $\alpha$ R1, tumor necrosis factor-alpha receptor 1; sTNF- $\alpha$ R2, tumor necrosis factor-alpha receptor 2. Results are presented as odds ratios and 95% CI, \*  $p < 0.05$ , \*\*  $p < 0.01$ , \*\*\*  $p < 0.001$ , || Significant test for trend ( $p < 0.05$ ).

\*Model A: Unadjusted.

†Model B: Adjusted for HIV serostatus, age, race, baseline education, center, cohort.

‡Model C: Adjusted for variables in model B along with cumulative pack years, alcohol consumption since last visit, HCV, BMI, SBP (per 10mm Hg), total cholesterol (per 5mg/dl), HDL (5mg/dl), glucose levels (per 10 mg/dl), and use of medication for hypertension, diabetes and high cholesterol.
