# Supplementary material for: Inflammatory biomarkers and subclinical carotid atherosclerosis in HIV-infected and HIV-uninfected men in the Multicenter AIDS Cohort Study
Source: PubMed Central journal article supplement (PMC6448851; doi:10.1371/journal.pone.0214735), 2019-04-04
Supplement: pone.0214735.s007.pdf [file pone.0214735.s007.pdf]

**S6 Table. Adjusted associations between inflammatory biomarkers (mutually adjusted for each other) and focal carotid plaque (N=728)**

| Biomarker         | Focal Plaque*            |                 |
|-------------------|--------------------------|-----------------|
|                   | aOR (95%CI)              | P-value         |
| sCD163            | 2.00 (0.99, 4.07)        | 0.05            |
| sCD14             | 1.32 (0.64, 2.72)        | 0.46            |
| ICAM-1            | 1.13 (0.57, 2.25)        | 0.73            |
| CCL2              | <b>3.16 (1.60, 6.22)</b> | <b>&lt;0.01</b> |
| CRP               | <b>2.27 (1.05, 4.90)</b> | <b>0.04</b>     |
| IL-6              | 1.55(0.73, 3.30)         | 0.25            |
| sTNF- $\alpha$ R1 | 0.54 (0.25, 1.17)        | 0.12            |
| sTNF- $\alpha$ R2 | 0.76 (0.33, 1.73)        | 0.51            |
| Fibrinogen        | 0.93 (0.46, 1.88)        | 0.84            |
| D-dimer           | 0.64 (0.34, 1.20)        | 0.16            |

Abbreviations: sCD163, cluster of differentiation 163; sCD14, cluster of differentiation 14; CCL2- chemokine (C-C motif) ligand 2; ICAM-1, intercellular cell adhesion molecule-1; CRP, C reactive protein; IL-6, interleukin-6; sTNF- $\alpha$ R1, tumor necrosis factor-alpha receptor 1; sTNF- $\alpha$ R2, tumor necrosis factor- alpha receptor 2. Results are from a single multivariable model including all ten biomarkers. Results are presented as adjusted odds ratios and 95% CI, bolded results are statistically significant ( $p < 0.05$ ).

\*Model adjusted for age, race, baseline education, center, cohort, cumulative pack years, alcohol consumption since last visit, HCV, BMI, SBP (per 10mm Hg), total cholesterol (per 5mg/dl), HDL (5mg/dl), glucose levels (per 10 mg/dl), and use of medication for hypertension, diabetes and high cholesterol.
