# Supplementary material for: Inflammatory biomarkers and subclinical carotid atherosclerosis in HIV-infected and HIV-uninfected men in the Multicenter AIDS Cohort Study
Source: PubMed Central journal article supplement (PMC6448851; doi:10.1371/journal.pone.0214735), 2019-04-04
Supplement: pone.0214735.s008.pdf [file pone.0214735.s008.pdf]

**S7 Table. Associations between inflammatory biomarkers and focal carotid plaque, by HIV serostatus (n=728)**

| Biomarker         | HIV infected (N=452) |                     |                  |             |                     |                 | HIV uninfected (N=276) |                     |              |             |                      |                  | Interaction term Model C (P-Value) |                      |                 |                  |
|-------------------|----------------------|---------------------|------------------|-------------|---------------------|-----------------|------------------------|---------------------|--------------|-------------|----------------------|------------------|------------------------------------|----------------------|-----------------|------------------|
|                   | Model B*             |                     | Model C†         |             | Model D‡            |                 | Model B*               |                     | Model C†     |             |                      |                  |                                    |                      |                 |                  |
|                   | aOR (95% CI)         | P-value             | aOR (95% CI)     | P-value     | aOR (95% CI)        | P-value         | aOR (95% CI)           | P-value             | aOR (95% CI) | P-value     |                      |                  |                                    |                      |                 |                  |
| <b>sCD163</b>     | <b>2.89</b>          | <b>[1.39, 6.00]</b> | <b>&lt;0.01</b>  | <b>2.62</b> | <b>[1.15, 5.97]</b> | <b>0.02</b>     | <b>3.39</b>            | <b>[1.36, 8.48]</b> | <b>0.01</b>  | 1.09        | [0.39, 3.06]         | 0.87             | 1.26                               | [0.35, 4.57]         | 0.72            | 0.29             |
| <b>sCD14</b>      | 1.29                 | [0.61, 2.72]        | 0.51             | 1.00        | [0.44, 2.28]        | 1.00            | 1.03                   | [0.43, 2.44]        | 0.95         | 3.71        | [0.74, 18.59]        | 0.11             | 4.91                               | [0.84, 28.82]        | 0.08            | 0.21             |
| <b>ICAM-1</b>     | 1.08                 | [0.55, 2.12]        | 0.82             | 0.77        | [0.36, 1.65]        | 0.50            | 0.74                   | [0.33, 1.66]        | 0.47         | <b>6.48</b> | <b>[2.34, 17.94]</b> | <b>&lt;0.001</b> | <b>6.8</b>                         | <b>[2.15, 21.54]</b> | <b>&lt;0.01</b> | <b>&lt;0.001</b> |
| <b>CCL2</b>       | <b>4.2</b>           | <b>[1.93, 9.11]</b> | <b>&lt;0.001</b> | <b>3.24</b> | <b>[1.45, 7.24]</b> | <b>&lt;0.01</b> | <b>3.12</b>            | <b>[1.37, 7.10]</b> | <b>0.01</b>  | 2.12        | [0.80, 5.61]         | 0.13             | 2.93                               | [0.98, 8.78]         | 0.06            | 0.87             |
| <b>CRP</b>        | <b>2.06</b>          | <b>[1.03, 4.09]</b> | <b>0.04</b>      | 2.05        | [0.98, 4.28]        | 0.06            | <b>2.26</b>            | <b>[1.05, 4.89]</b> | <b>0.04</b>  | 2.36        | [0.87, 6.35]         | 0.09             | 3.23                               | [0.97, 10.82]        | 0.06            | 0.58             |
| <b>IL-6</b>       | 1.86                 | [0.91, 3.77]        | 0.09             | 1.59        | [0.73, 3.45]        | 0.24            | 1.37                   | [0.61, 3.07]        | 0.44         | 2.35        | [0.89, 6.18]         | 0.08             | <b>3.15</b>                        | <b>[1.01, 9.81]</b>  | <b>0.05</b>     | 0.34             |
| <b>sTNF-αR1</b>   | 1.19                 | [0.62, 2.28]        | 0.61             | 0.68        | [0.33, 1.44]        | 0.32            | 0.56                   | [0.26, 1.21]        | 0.14         | 0.59        | [0.21, 1.65]         | 0.31             | 0.82                               | [0.25, 2.63]         | 0.73            | 0.74             |
| <b>sTNF-αR2</b>   | <b>2.03</b>          | <b>[1.02, 4.03]</b> | <b>0.04</b>      | 1.54        | [0.72, 3.29]        | 0.26            | 1.56                   | [0.70, 3.51]        | 0.28         | 0.73        | [0.25, 2.13]         | 0.57             | 0.71                               | [0.22, 2.32]         | 0.57            | 0.33             |
| <b>Fibrinogen</b> | 1.38                 | [0.72, 2.63]        | 0.33             | 1.29        | [0.64, 2.60]        | 0.48            | 1.36                   | [0.65, 2.87]        | 0.42         | <b>3.70</b> | <b>[1.12, 12.23]</b> | <b>0.03</b>      | <b>4.09</b>                        | <b>[1.10, 15.18]</b> | <b>0.04</b>     | 0.16             |
| <b>D-dimer</b>    | 0.98                 | [0.52, 1.84]        | 0.95             | 0.92        | [0.47, 1.80]        | 0.80            | 1.01                   | [0.50, 2.05]        | 0.97         | 1.13        | [0.43, 2.98]         | 0.81             | 0.76                               | [0.26, 2.19]         | 0.61            | 0.72             |

Abbreviations: sCD163, cluster of differentiation 163; sCD14, cluster of differentiation 14; CCL2, chemokine (C-C motif) ligand 2; ICAM-1, intercellular cell adhesion molecule-1; CRP, C reactive protein; IL-6, interleukin-6; sTNF-αR1, tumor necrosis factor-alpha receptor 1; sTNF-αR2, tumor necrosis factor-alpha receptor 2. Results presented as adjusted odds ratio (95% CI), bolded results are statistically significant (p < 0.05).

\*Model B: Adjusted for age, race, baseline education, center, cohort.

†Model C: Adjusted for variables in model B along with cumulative pack years, alcohol consumption since last visit, HCV, BMI, SBP (per 10mm Hg), total cholesterol (per 5mg/dl), HDL (5mg/dl), glucose levels (per 10 mg/dl), and use of medication for hypertension, diabetes and high cholesterol.

‡Model D: Adjusted for variables in Model C along with HIV specific factors, CD4 count, CD4 nadir, diagnosis of AIDS, virologically unsuppressed in the past 5 years.
