# Supplementary material for: Inflammatory biomarkers and subclinical carotid atherosclerosis in HIV-infected and HIV-uninfected men in the Multicenter AIDS Cohort Study
Source: PubMed Central journal article supplement (PMC6448851; doi:10.1371/journal.pone.0214735), 2019-04-04
Supplement: pone.0214735.s009.pdf [file pone.0214735.s009.pdf]

| Biomarker  | Plaque (N=372)          |              |                         |              | cIMT (N=372)           |               |                        |               | Bifurcation-IMT (N=363) |               |                        |               |
|------------|-------------------------|--------------|-------------------------|--------------|------------------------|---------------|------------------------|---------------|-------------------------|---------------|------------------------|---------------|
|            | Model C*<br>aOR (95%CI) |              | Model D†<br>aOR (95%CI) |              | Model C*<br>β (95% CI) |               | Model D†<br>β (95% CI) |               | Model C*<br>β (95% CI)  |               | Model D†<br>β (95% CI) |               |
| Quintile 1 | Ref                     | Ref          | Ref                     | Ref          | Ref                    | Ref           | Ref                    | Ref           | Ref                     | Ref           | Ref                    | Ref           |
| Quintile 2 | 1.72                    | [0.84, 3.54] | 1.81                    | [0.85, 3.82] | -0.03                  | [-0.07, 0.01] | -0.03                  | [-0.07, 0.01] | -0.01                   | [-0.06, 0.04] | 0.00                   | [-0.05, 0.05] |
| Quintile 3 | 0.89                    | [0.42, 1.90] | 0.89                    | [0.41, 1.93] | -0.04                  | [-0.08, 0.00] | -0.04                  | [-0.08, 0.01] | -0.02                   | [-0.08, 0.03] | -0.02                  | [-0.07,0.03]  |
| Quintile 4 | 0.81                    | [0.35, 1.89] | 0.76                    | [0.32, 1.81] | -0.03                  | [-0.08, 0.01] | -0.03                  | [-0.08, 0.02] | -0.02                   | [-0.08, 0.03] | -0.02                  | [-0.07, 0.04] |
| Quintile 5 | 1.02                    | [0.47, 2.19] | 1.09                    | [0.49, 2.42] | -0.04                  | [-0.08, 0.00] | -0.04                  | [-0.08, 0.00] | -0.04                   | [-0.09, 0.01] | -0.04                  | [-0.09, 0.02] |

Abbreviations: sCD163, cluster of differentiation 163; sCD14, cluster of differentiation 14; CCL2, chemokine (C-C motif) ligand 2; ICAM-1, intercellular cell adhesion molecule-1; CRP, C reactive protein; IL-6, interleukin-6; sTNF-αR1, tumor necrosis factor-alpha receptor 1; sTNF-αR2, tumor necrosis factor-alpha receptor 2. Results presented as adjusted odds ratios (95% CI), bolded results are statistically significant (p < 0.05).

\*Model C: Adjusted for age, race, baseline education, center, cohort, cumulative pack years, alcohol consumption since last visit, HCV, BMI, SBP (per 10mm Hg), total cholesterol (per 5mg/dl), HDL (5mg/dl), glucose levels (per 10 mg/dl), and use of medication for hypertension, diabetes and high cholesterol.

†Model D: Adjusted for variables in Model C along with HIV specific factors, CD4 count, CD4 nadir, diagnosis of AIDS.
