# Supplementary material for: Inflammatory biomarkers and subclinical carotid atherosclerosis in HIV-infected and HIV-uninfected men in the Multicenter AIDS Cohort Study
Source: PubMed Central journal article supplement (PMC6448851; doi:10.1371/journal.pone.0214735), 2019-04-04
Supplement: pone.0214735.s012.pdf [file pone.0214735.s012.pdf]

**S11 Table. Associations between inflammatory biomarkers and IMT at the bifurcation of the right common carotid artery (N=672)**

| Biomarker     | Model A*   |               | Model B†   |               | Model C‡   |               |
|---------------|------------|---------------|------------|---------------|------------|---------------|
|               | β (95% CI) |               | β (95% CI) |               | β (95% CI) |               |
| <b>sCD163</b> |            |               |            |               |            |               |
| Quintile 1    | Ref        | Ref           | Ref        | Ref           | Ref        | Ref           |
| Quintile 2    | 0.02       | [-0.02, 0.06] | 0.01       | [-0.02, 0.05] | 0.02       | [-0.02, 0.05] |
| Quintile 3    | 0.02       | [-0.02, 0.06] | 0.02       | [-0.02, 0.06] | 0.02       | [-0.01, 0.06] |
| Quintile 4    | 0.03       | [-0.01, 0.07] | 0.03       | [-0.01, 0.07] | 0.03       | [-0.01, 0.07] |
| Quintile 5    | 0.03       | [-0.01, 0.07] | 0.02       | [-0.02, 0.06] | 0.02       | [-0.02, 0.07] |
| <b>sCD14</b>  |            |               |            |               |            |               |
| Quintile 1    | Ref        | Ref           | Ref        | Ref           | Ref        | Ref           |
| Quintile 2    | -0.01      | [-0.05, 0.03] | -0.01      | [-0.05, 0.03] | -0.01      | [-0.05, 0.03] |
| Quintile 3    | 0.01       | [-0.03, 0.05] | 0.01       | [-0.03, 0.05] | 0.01       | [-0.03, 0.04] |
| Quintile 4    | 0.00       | [-0.04, 0.04] | 0.01       | [-0.03, 0.05] | 0.02       | [-0.02, 0.06] |
| Quintile 5    | 0.01       | [-0.03, 0.05] | 0.01       | [-0.04, 0.05] | 0.01       | [-0.03, 0.05] |
| <b>ICAM-1</b> |            |               |            |               |            |               |
| Quintile 1    | Ref        | Ref           | Ref        | Ref           | Ref        | Ref           |
| Quintile 2    | 0.02       | [-0.02, 0.06] | 0.03       | [-0.01, 0.07] | 0.03       | [-0.01, 0.06] |
| Quintile 3    | 0.02       | [-0.02, 0.06] | 0.03       | [-0.01, 0.07] | 0.03       | [-0.00, 0.07] |
| Quintile 4    | 0.03       | [-0.01, 0.07] | 0.03       | [-0.01, 0.07] | 0.02       | [-0.02, 0.06] |
| Quintile 5    | 0.05**     | [0.01, 0.09]  | 0.06**     | [0.02, 0.10]  | 0.05*      | [0.01, 0.09]  |
| <b>CCL2</b>   |            |               |            |               |            |               |
| Quintile 1    | Ref        | Ref           | Ref        | Ref           | Ref        | Ref           |
| Quintile 2    | 0.00       | [-0.04, 0.04] | 0.00       | [-0.03, 0.04] | 0.01       | [-0.03, 0.05] |
| Quintile 3    | 0.01       | [-0.03, 0.05] | 0.01       | [-0.03, 0.05] | 0.01       | [-0.03, 0.05] |
| Quintile 4    | 0.03       | [-0.01, 0.07] | 0.01       | [-0.03, 0.05] | 0.01       | [-0.03, 0.05] |
| Quintile 5    | 0.06**     | [0.02, 0.10]  | 0.05*      | [0.01, 0.09]  | 0.04*      | [0.00, 0.08]  |
| <b>CRP</b>    |            |               |            |               |            |               |
| Quintile 1    | Ref        | Ref           | Ref        | Ref           | Ref        | Ref           |
| Quintile 2    | -0.03      | [-0.07, 0.01] | -0.03      | [-0.06, 0.01] | -0.03      | [-0.07, 0.00] |
| Quintile 3    | 0.01       | [-0.03, 0.04] | 0          | [-0.03, 0.04] | -0.01      | [-0.05, 0.03] |
| Quintile 4    | 0.03       | [-0.00, 0.07] | 0.03       | [-0.00, 0.07] | 0.02       | [-0.02, 0.05] |
| Quintile 5    | 0.04*      | [0.00, 0.08]  | 0.03       | [-0.01, 0.07] | 0.02       | [-0.02, 0.05] |
| <b>IL-6</b>   |            |               |            |               |            |               |
| Quintile 1    | Ref        | Ref           | Ref        | Ref           | Ref        | Ref           |
| Quintile 2    | 0.04*      | [0.00, 0.08]  | 0.03       | [-0.01, 0.06] | 0.02       | [-0.02, 0.06] |
| Quintile 3    | 0.04*      | [0.00, 0.08]  | 0.02       | [-0.01, 0.06] | 0.01       | [-0.03, 0.05] |
| Quintile 4    | 0.08***    | [0.04, 0.12]  | 0.06**     | [0.02, 0.10]  | 0.05*      | [0.01, 0.09]  |

| <b>Biomarker</b>  | <b>Model A*</b><br><b>β (95% CI)</b> |               | <b>Model B†</b><br><b>β (95% CI)</b> |               | <b>Model C‡</b><br><b>β (95% CI)</b> |               |
|-------------------|--------------------------------------|---------------|--------------------------------------|---------------|--------------------------------------|---------------|
| <b>sTNF-αR1</b>   |                                      |               |                                      |               |                                      |               |
| Quintile 5        | 0.06**                               | [0.02, 0.09]  | 0.03                                 | [-0.01, 0.07] | 0.02                                 | [-0.02, 0.06] |
| Quintile 1        | Ref                                  | Ref           | Ref                                  | Ref           | Ref                                  | Ref           |
| Quintile 2        | 0.02                                 | [-0.02, 0.06] | 0.02                                 | [-0.01, 0.06] | 0.03                                 | [-0.01, 0.07] |
| Quintile 3        | 0.02                                 | [-0.02, 0.06] | 0.02                                 | [-0.02, 0.06] | 0.02                                 | [-0.02, 0.06] |
| Quintile 4        | 0.01                                 | [-0.02, 0.05] | 0.01                                 | [-0.03, 0.05] | 0.02                                 | [-0.02, 0.06] |
| Quintile 5        | 0.05**                               | [0.01, 0.09]  | 0.04                                 | [-0.00, 0.08] | 0.04*                                | [0.00, 0.08]  |
| <b>sTNF-αR2</b>   |                                      |               |                                      |               |                                      |               |
| Quintile 1        | Ref                                  | Ref           | Ref                                  | Ref           | Ref                                  | Ref           |
| Quintile 2        | 0.01                                 | [-0.03, 0.05] | 0.00                                 | [-0.04, 0.04] | 0.00                                 | [-0.04, 0.04] |
| Quintile 3        | 0.01                                 | [-0.02, 0.05] | 0.01                                 | [-0.03, 0.04] | 0.01                                 | [-0.03, 0.05] |
| Quintile 4        | -0.01                                | [-0.05, 0.03] | -0.01                                | [-0.05, 0.03] | -0.01                                | [-0.05, 0.03] |
| Quintile 5        | 0.03                                 | [-0.01, 0.07] | 0.01                                 | [-0.03, 0.05] | 0.02                                 | [-0.02, 0.06] |
| <b>Fibrinogen</b> |                                      |               |                                      |               |                                      |               |
| Quintile 1        | Ref                                  | Ref           | Ref                                  | Ref           | Ref                                  | Ref           |
| Quintile 2        | 0.00                                 | [-0.04, 0.04] | 0.01                                 | [-0.03, 0.04] | 0.00                                 | [-0.03, 0.04] |
| Quintile 3        | 0.02                                 | [-0.02, 0.06] | 0.00                                 | [-0.03, 0.04] | 0.00                                 | [-0.04, 0.03] |
| Quintile 4        | 0.03                                 | [-0.01, 0.07] | 0.01                                 | [-0.02, 0.05] | 0.00                                 | [-0.04, 0.04] |
| Quintile 5        | 0.07***                              | [0.03, 0.11]  | 0.05*                                | [0.01, 0.09]  | 0.03                                 | [-0.01, 0.07] |
| <b>D-dimer</b>    |                                      |               |                                      |               |                                      |               |
| Quintile 1        | Ref                                  | Ref           | Ref                                  | Ref           | Ref                                  | Ref           |
| Quintile 2        | 0.02                                 | [-0.02, 0.06] | 0.01                                 | [-0.03, 0.05] | 0.01                                 | [-0.02, 0.05] |
| Quintile 3        | 0.01                                 | [-0.03, 0.05] | -0.01                                | [-0.05, 0.02] | -0.01                                | [-0.05, 0.02] |
| Quintile 4        | 0.05*                                | [0.01, 0.09]  | 0.02                                 | [-0.02, 0.06] | 0.02                                 | [-0.01, 0.06] |
| Quintile 5        | 0.02                                 | [-0.02, 0.06] | -0.02                                | [-0.06, 0.01] | -0.02                                | [-0.06, 0.02] |

Abbreviations: sCD163, cluster of differentiation 163; sCD14, cluster of differentiation 14; CCL2, chemokine (C-C motif) ligand 2; ICAM-1, intercellular cell adhesion molecule-1; CRP, C reactive protein; IL-6, interleukin-6; sTNF-αR1, tumor necrosis factor-alpha receptor 1; sTNF-αR 2, tumor necrosis factor-alpha receptor 2. Results presented as β coefficients and 95% confidence intervals, \*  $p < 0.05$ , \*\*  $p < 0.01$ , \*\*\*  $p < 0.001$

\*Model A: Unadjusted.

†Model B: Adjusted for HIV serostatus, age, race, baseline education, center, cohort.

‡Model C: Adjusted for variables in model B along with cumulative pack years, alcohol consumption since last visit, HCV, BMI, SBP (per 10mm Hg), total cholesterol (per 5mg/dl), HDL (5mg/dl), glucose levels (per 10 mg/dl), and use of medication for hypertension, diabetes and high cholesterol.
